# Supplementary material
Source: publisher figshare collection journal article supplement (https://sage.figshare.com/ndownloader/files/14625623)
Supplement: Supplementary file 1 [file 14625623]

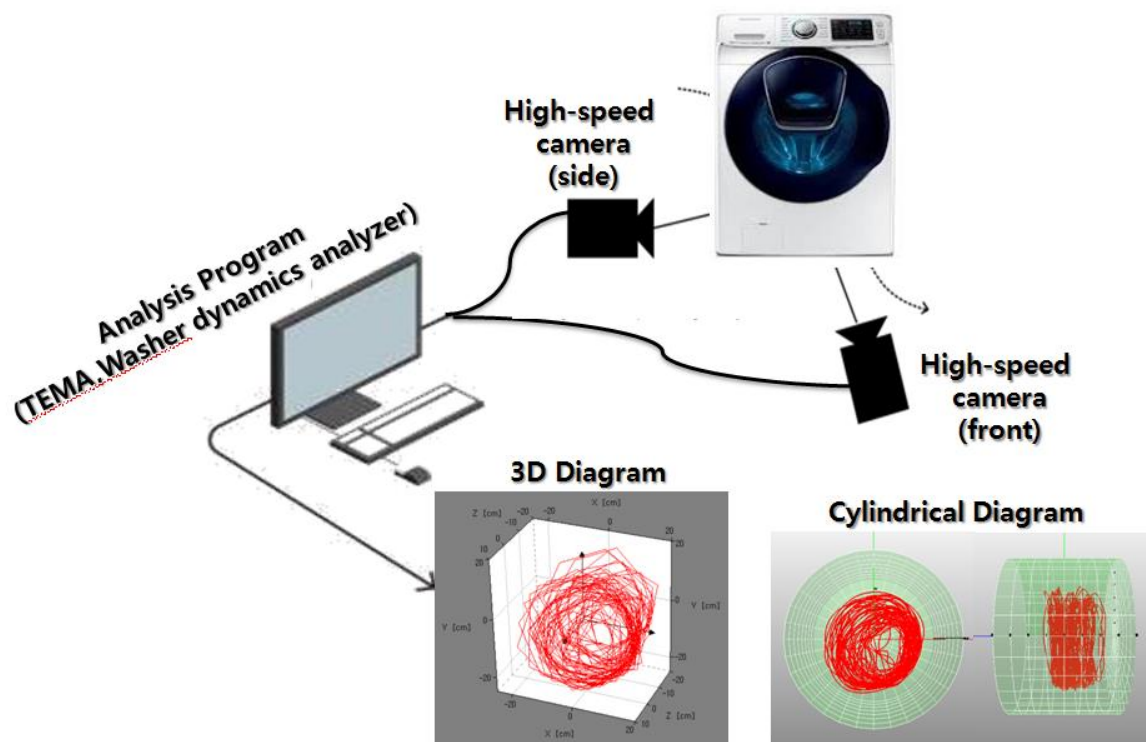

Figure S1. Schematic illustration of recording the fabric movement.

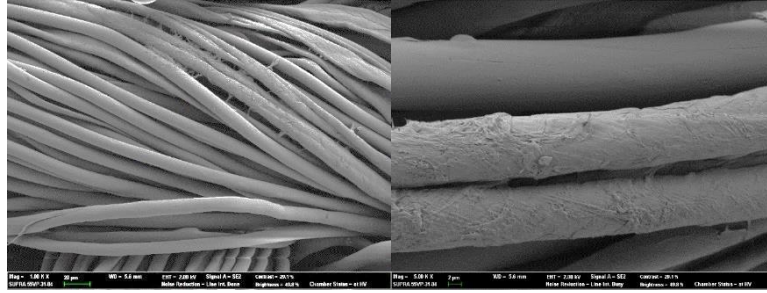

(a)

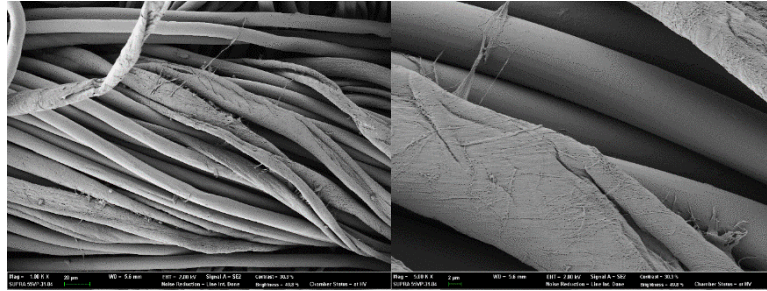

(b)

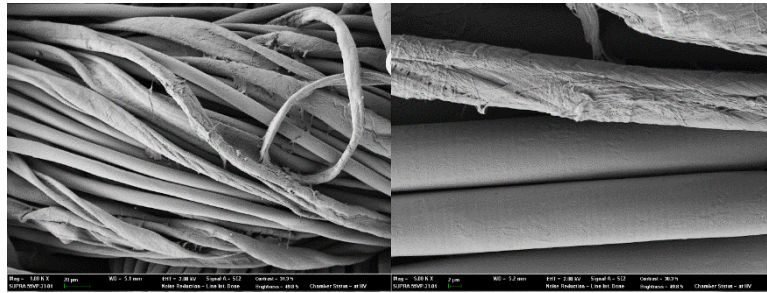

(c)

Figure S2. SEM images of fabric samples; (a) unwashed sample, (b) washed by the new system with a built-in pulsator and (c) washed by conventional system.
